1 **The ATP-dependent chromatin remodelling enzyme Uls1 prevents Topoisomerase II poisoning**

2

3

4 Amy Swanston<sup>1,2</sup>, Katerina Zabradý<sup>1,2</sup> and Helder C. Ferreira<sup>\*1</sup>

5

6 Affiliations: <sup>1</sup> Biomedical Sciences Research Complex, School of Biology, University of St Andrews, St

7

Andrews, KY16 9ST, UK.

8

<sup>2</sup> Joint first authors.

9

10 \* Corresponding author: [hcf2@st-andrews.ac.uk](mailto:hcf2@st-andrews.ac.uk)

11

12 Short title: Regulation of topoisomerase II chromatin binding by Uls1

13 **ABSTRACT**

14 Topoisomerase II (Top2) is an essential enzyme that decatenates DNA via a transient Top2-DNA  
15 covalent intermediate. This intermediate can be stabilised by a class of drugs termed Top2 poisons,  
16 resulting in massive DNA damage. Thus, Top2 activity is a double-edged sword that needs to be  
17 carefully controlled to maintain genome stability. We show that Uls1, an ATP-dependent chromatin  
18 remodelling (Snf2) enzyme, can alter Top2 chromatin binding and prevent Top2 poisoning in yeast.  
19 Deletion mutants of *ULS1* are hypersensitive to the Top2 poison acriflavine (ACF), activating the DNA  
20 damage checkpoint. We map Uls1's Top2 interaction domain and show that this, together with its  
21 ATPase activity, is essential for Uls1 function. By performing ChIP-seq, we show that ACF leads to a  
22 general increase in Top2 binding across the genome. We map Uls1 binding sites and identify tRNA  
23 genes as key regions where Uls1 associates after ACF treatment. Importantly, the presence of Uls1  
24 at these sites prevents ACF-dependent Top2 accumulation. Our data reveal the effect of Top2  
25 poisons on the global Top2 binding landscape and highlights the role of Uls1 in antagonising Top2  
26 function. Remodelling Top2 binding is thus an important new means by which Snf2 enzymes promote  
27 genome stability.

28

29 **INTRODUCTION**

30 All eukaryotic genomes are organised into chromatin; a complex arrangement of DNA and associated  
31 binding proteins. Due to the relative inaccessibility of DNA within chromatin, a universal problem  
32 facing eukaryotes is how to access their genetic information. One of the means by which this is  
33 achieved is by mechanically altering local chromatin structure through the action of ATP-dependent  
34 chromatin remodelling (Snf2) enzymes (1). These proteins are ubiquitous amongst eukaryotes (2) and  
35 their influence on chromatin structure means that Snf2 proteins affect all DNA-based transactions  
36 such as DNA transcription, replication and repair (3). Underscoring their importance, mutations within  
37 human Snf2 proteins cause a range of developmental disorders (4, 5) and SWI/SNF is the most  
38 commonly mutated chromatin-regulatory complex in human cancers (6). The majority of Snf2 proteins  
39 act by remodelling nucleosomes (1). However, some Snf2 proteins have been shown to act on non-  
40 nucleosomal DNA binding proteins such as TBP (7, 8) and Rad51 (9-11). Indeed, for others, their  
41 functions remain largely unknown. Here, we use budding yeast to study one such Snf2 factor, *ULS1*

42 and find that its deletion results in hypersensitivity to the Topoisomerase II (Top2) poison acriflavine  
43 (ACF).

44

45 Top2 is an essential mediator of genome stability due to its ability to disentangle DNA molecules and  
46 resolve DNA torsional stress (12). Loss of Top2 causes irreparable defects in cell division whereas  
47 blocking Top2 catalytic activity induces massive DNA damage and checkpoint arrest (13). As part of  
48 its reaction cycle, Top2 forms a transient protein-DNA adduct termed the cleavage complex (12). If  
49 this intermediate is not resolved, it results in the formation of a DNA single-strand or double-strand  
50 break next to a covalent Top2-DNA adduct (14, 15); both highly cytotoxic lesions. This enzymatic  
51 weakness is targeted by Top2-poisons, which act to stabilise the cleavage complex (15). This is in  
52 contrast to the mechanism of Top2 catalytic inhibitors, which do not stabilise cleavage complex  
53 formation (16). The ability of Top2 poisons to turn Top2's enzymatic activity against itself makes them  
54 an important class of anti-cancer drugs. However, even in non-cancerous cells, excess  
55 topoisomerase activity is potentially dangerous as it increases the probability that some  
56 topoisomerase molecules will stall as cleavage complexes. Several endogenous protein inhibitors of  
57 topoisomerase activity exist in bacteria (17-19). Therefore, it is perhaps a little surprising that  
58 equivalent eukaryotic topoisomerase inhibitors have not previously been described.

59

60 We find that Uls1 helps to keep Top2 activity in check by altering its chromatin association. Uls1 binds  
61 Top2 via a Top2-interaction domain (amino acids 350-655) and has DNA-stimulated ATPase activity.  
62 Both Uls1's Top2 interaction domain and ATPase activity are essential for its function, consistent with  
63 the idea that it remodels chromatin-bound Top2. This is in agreement with a recent report showing  
64 that the homolog of Uls1 in the distantly related yeast *Schizosaccharomyces pombe*, can displace  
65 Top2 from DNA (20). Moreover, we extend these observations by mapping how Uls1 influences the  
66 genome-wide binding distribution of Top2 *in vivo*. Using ChIP-seq, we show that ACF causes a  
67 general increase in Top2 binding across the genome, except at Uls1 binding sites. Thus, the  
68 presence of Uls1 is sufficient to displace Top2 from chromatin after exposure to ACF. Uls1 binding  
69 sites are distributed throughout the genome but, in the presence of ACF, become enriched at tRNA  
70 genes. Interestingly, many tRNA genes show a *ULS1*-dependent decrease in Top2 binding after ACF  
71 treatment. This reveals unexpected complexity in the function of Uls1 and suggests that targeting

72 related human Snf2 proteins may reduce the toxicity associated with Top2 poisons by sensitising  
73 cancers to these drugs (21, 22).

74

## 75 **RESULTS**

### 76 **Excess Top2 activity is toxic to *uls1Δ* cells**

77 Deletion of *ULS1* does not result in a dramatic growth defect or in sensitivity to a variety of DNA  
78 damaging drugs (S1A Fig). This apparent absence of phenotype initially hindered our attempts to  
79 understand its function. However, a previous large-scale chemogenetic screen identified ACF as a  
80 drug that specifically kills *uls1Δ* yeast (26) and we confirmed the potent toxicity of ACF (Fig 1A). ACF  
81 has been described as having antibacterial (27), antimalarial (28) and anti-cancer properties (29).  
82 This broad range of activity is likely due to the fact that ACF inhibits type II topoisomerase activity *in*  
83 *vitro* (28, 30). We show that in budding yeast, ACF acts as a Top2 poison rather than as a Top2  
84 catalytic inhibitor. ACF stabilises Top2 cleavage complex formation *in vitro* and ACF toxicity is  
85 enhanced by Top2 over-expression *in vivo* (S1B-C Fig) – both hallmarks of Top2 poisons. Our data  
86 are consistent with a previous study showing that acriflavine stabilises the formation of type II  
87 topoisomerase cleavage complexes within trypanosome mitochondria *in vivo* (31). To explore the  
88 pathways targeted by ACF in yeast, we isolated spontaneous ACF suppressor mutants of *uls1Δ*  
89 strains in a forward genetic screen. Of the eight independent suppressor colonies tested, all contained  
90 single point mutations within *TOP2*, two of which were identified multiple times (Fig 1B). These data  
91 show that Top2 is the most significant factor mediating ACF toxicity in yeast.

92

93 To test whether *uls1Δ* cells are generally sensitive to Top2 poisons, we additionally tested the Top2  
94 poisons, ellipticine. We find that *ULS1* deletion results in sensitivity to ellipticine but only in a  
95 sensitising *rad51Δ* background (S2A Fig). This may reflect subtle differences in their mode of action  
96 (32, 33) or in drug uptake. Indeed, Top2 poisons such as etoposide are poorly taken up by yeasts,  
97 meaning that drug sensitivity in wildtype cells is typically only observed in genetic backgrounds that  
98 contain plasma membrane pump mutations (20, 34). In contrast, we find that ACF uptake from agar  
99 plates is very efficient, even in strains without membrane pump mutations. We have taken advantage  
100 of this to carry out a genome-wide deletion library screen for ACF sensitivity in an otherwise wildtype  
101 yeast background, which will be published elsewhere. We introduced the *TOP2* alleles identified in

102 our ACF suppressor strains into independent yeast strains. This confirmed that the suppression  
103 phenotype observed was solely due to mutations in *TOP2* and not of any other factor (Fig 1C). The  
104 suppression of the initial *uls1Δ* ACF sensitivity was complete as *uls1Δ top2 I1121V* or *uls1Δ top2*  
105 *Y510C* double mutant cells grew indistinguishably from wildtype (Fig 1C). This further reinforces the  
106 notion that Top2 is the key target of ACF *in vivo*. Whilst we cannot exclude that ACF affects other  
107 cellular pathways, if it does, they do not significantly affect cellular growth or viability.

108

109 The ACF suppressor mutations identified did not cluster within the three-dimensional Top2 protein  
110 structure (Fig 1B), making it unlikely that they were affecting a protein-protein interaction. Instead, we  
111 hypothesized that the suppressor mutations were influencing Top2 catalytic activity. To test this, we  
112 purified wildtype and mutant yeast Top2 and carried out *in vitro* decatenation reactions. As seen in Fig  
113 1D, Top2 I1121V was able to unlink the interlocked rings of kinetoplastid DNA, in contrast to the  
114 ATPase dead Top2 E66Q allele. However, Top2 I1121V was approximately 16-fold less active than  
115 wildtype. These data are consistent with ACF acting as a Top2 poison as reduced Top2 enzymatic  
116 activity results in lower drug toxicity. Consequently, the most likely reason that *uls1Δ* cells are more  
117 sensitive to ACF than wildtype is that they have increased Top2 activity. This antagonism between  
118 Uls1 and Top2 is not just drug dependent as overexpression of Top2 is toxic to *uls1Δ* yeast, even in  
119 the absence of ACF (S1C Fig).

120

### 121 **Amino acids 350-650 within Uls1 mediate physical interaction with Top2**

122 Having established a genetic interaction between Top2 and Uls1, we asked the question whether  
123 these two proteins interact physically. Using a yeast 2-hybrid (Y2H) assay, we detected weak but  
124 reproducible binding between full-length Uls1 and full-length Top2 *in vivo*. Furthermore, we could  
125 narrow down the region of Uls1 required for Top2 interaction to fragment 350-655 (Fig 2A). To verify  
126 that the Uls1-Top2 binding interaction observed was direct, we assayed their ability to interact *in vitro*.  
127 Using purified proteins, we confirmed that Uls1 fragment 350-655 binds to Top2 *in vitro* (Fig 2B). This  
128 region of Uls1 contains several putative SUMO-interaction motifs (SIMs) (35) and is able to bind  
129 SUMO by Y2H assay (S3A Fig). Moreover, Top2 can be sumoylated *in vivo* (36). However, the  
130 purified Top2 used in our *in vitro* binding assays had no detectable sumoylation, as determined by

131 mass spectrometry (data not shown). Therefore, Uls1 binding to Top2 is unlikely to require Top2  
132 sumoylation, although it might be enhanced by it.

133

134 To assess the functional significance of Uls1-Top2 interaction, we introduced a range of mutations  
135 into the endogenous *ULS1* gene and FLAG-tagged it to monitor its expression level. Strikingly,  
136 deletion of the Top2 interaction domain, *uls1*  $\Delta$ 350-655, mimicked complete loss of *ULS1* (Fig 2C). In  
137 contrast, mutating all predicted SIMs in Uls1 resulted in only moderate ACF sensitivity. These data  
138 show that Top2 interaction is essential for Uls1 activity whereas SUMO-binding merely promotes it. As  
139 expected for a Snf2-family enzyme, mutating the Walker B motif (E1109Q) within the ATPase domain  
140 of Uls1 completely inactivated its function. However, mutating Uls1's RING domain (C1385S) had no  
141 significant effect (Fig 2C). It is important to note that none of the phenotypes observed are due to  
142 altered Uls1 protein levels (Fig 2D). Uls1 has previously been proposed to act as a SUMO-targeted  
143 Ubiquitin Ligase (STUbL), with SUMO-targeting being mediated via its SIMs and the RING domain  
144 acting as an E3 Ubiquitin ligase (35). However, in the context of ACF resistance, we see that Uls1's  
145 RING domain is dispensable, and that SIMs play an important but non-essential role. Therefore, it  
146 appears unlikely that Uls1 is acting as a STUbL on Top2 and indeed, Top2 protein levels do not  
147 change significantly in *uls1* $\Delta$  strains (S3B Fig).

148

#### 149 **Uls1 has weak DNA stimulated ATPase activity**

150 ATP-hydrolysis is an essential feature of all Snf2 proteins (1). To characterise Uls1's ATPase activity,  
151 we attempted to purify the full-length protein from yeast. However, Uls1 is a large (184kDa), low  
152 abundance protein and overexpressing it in yeast or *Sf9* insect cells gave very poor yields. We  
153 noticed that deleting the first 349 amino acids of Uls1 resulted in a significant increase in yeast  
154 expression (data not shown). Amino acids 327-350 contain a predicted nuclear localisation signal  
155 (NLS). However, in terms of catalytic function, the Uls1  $\Delta$ 1-349 protein is fully active (S3C Fig) and  
156 therefore suitable for biochemical characterisation.

157

158 Uls1 ATP hydrolysis was monitored via a coupled enzymatic reaction utilizing pyruvate kinase and  
159 lactate dehydrogenase to oxidise NADH (25) (Fig 3A). We find that Uls1 displayed weak DNA-  
160 stimulated ATPase activity (Fig 3B). This ATPase activity is due to Uls1 and not a contaminating

161 protein as it was abolished in an ATPase mutant (E1109Q) version of Uls1 (Fig 3B-C). We also tested  
162 whether Uls1's ATPase activity would be activated by Top2 *in vitro*. However, we were unable to  
163 detect any measureable Uls1-dependent increase in ATPase activity in the presence of Top2 (S4 Fig).  
164 This was also true if we used a version of Top2 with a 5xSUMO tag on its C-terminus to mimic  
165 endogenous sumoylation (data not shown). These assays were hampered by the very low amounts of  
166 Uls1 that we were able to purify. It is possible that the concentrations of Uls1 used may be below its  
167 association constant for Top2 or that we have not used appropriate reaction conditions, making it  
168 difficult to draw strong conclusions from these experiments. However, importantly, we have been able  
169 to show that purified Uls1 has DNA-stimulated ATPase activity. To the best of our knowledge, all  
170 Snf2-family enzymes tested have shown DNA-stimulated ATPase activity *in vitro* as they all act on  
171 DNA-bound substrates *in vivo* (8, 37-39). Therefore, Uls1 behaves functionally as a *bone fide* Snf2  
172 protein.

173

#### 174 **Deletion of *ULS1* results in a global increase in acriflavine-stabilized Top2 on DNA**

175 Because of the antagonistic relationship between Uls1 and Top2 activity (Fig 1C and Fig 1E), we  
176 decided to test whether Uls1 influenced Top2 localisation *in vivo*. To this end, we performed ChIP-seq  
177 on strains with an extra HA-tagged copy of *TOP2* under the control of its endogenous promoter in  
178 wildtype (HFY250) and *uls1Δ* (HFY252) cells both in the presence and absence of 250μM ACF.  
179 These strains were used as they show the expected ACF sensitivity in a *uls1Δ* background. In  
180 contrast, a *uls1Δ* strain where only the endogenous copy of *TOP2* is HA-tagged has suppressed ACF  
181 sensitivity (S3B Fig). Four independent ChIP replicates of each condition were pooled to form two  
182 DNA sequencing replicates which were aligned to the W303 genome reference (40) using BWA (41)  
183 and subjected to automated peak calling by MACS2 software (42). As expected of a Top2 poison, we  
184 saw that ACF caused an increase in the number of Top2 peaks called (S5A Fig). Importantly, ACF  
185 also caused a significant increase in the intensity of Top2 peaks. Due to the large number of data  
186 points involved, statistical significance was assessed using Cohen's d (*d*), which measures effect  
187 sizes based on the difference between two means. Cohen's d values of 0.2, 0.5 or 0.8 typically  
188 denote a small, medium or large effect respectively (43). By performing a pairwise comparison of  
189 common peaks, we saw that the addition of ACF resulted in a modest increase (*d* = 0.49) in the  
190 average Top2 peak intensity in wildtype cells (Fig 4A). Strikingly, the increase in Top2 peak intensity

191 after ACF treatment in a *uls1Δ* strain (Fig 4B) was much more pronounced ( $d = 1.56$ ). By directly  
192 comparing common Top2 peaks between wildtype and *uls1Δ* cells exposed to ACF, we could confirm  
193 that significantly more Top2 ( $d = 0.62$ ) becomes DNA-bound in *uls1Δ* cells compared to wildtype (Fig  
194 4C). These data explain the genetic interactions we had seen and suggest that *uls1Δ* cells exposed to  
195 ACF die because an excessive amount of Top2 becomes bound to chromatin. Top2 ChIP qPCR in  
196 strains where only the endogenous *TOP2* gene is HA-tagged confirmed the trends we were seeing  
197 via ChIP-seq (S5B Fig). These data also suggest that *TOP2* copy number does not bias ACF-  
198 dependent changes in Top2 chromatin association.

199

200 Top2 is known to be associated with ongoing transcription (44). Consistent with this, we find that  
201 when Top2 peaks are near genes, these are highly expressed under conditions of exponential growth  
202 (45) (Fig 4D). The addition of ACF results in an overall increase in Top2 peak number as well as the  
203 distribution of peaks becoming much less biased towards highly expressed genes. This shows that  
204 ACF-dependent Top2 peaks are associated with genes but are largely uncoupled from their initial  
205 transcription level in unperturbed cells. Interestingly, a similar trend is seen with human cells, where  
206 TOP2A-dependent cleavage complex formation within protein coding genes is independent of  
207 transcription level (46). By plotting Top2 peak probability relative to the transcription start site (TSS) of  
208 the 'average' RNA Pol II transcribed gene, we find that Top2 is more likely bound within gene bodies  
209 both in WT and *uls1Δ* cells (Fig 4E). Interestingly, this pattern is largely unchanged when WT cells are  
210 exposed to ACF. In contrast, *uls1Δ* cells exposed to ACF display a dramatic change such that Top2  
211 peaks are now more likely to be found upstream of the TSS within intergenic regions rather than  
212 within coding sequences (Fig 4E). Therefore, *uls1Δ* cells exposed to ACF not only have increased  
213 levels of Top2 bound to DNA but its distribution across genes becomes markedly disrupted.

214

### 215 **Uls1-bound regions do not accumulate Top2 after exposure to ACF**

216 We decided to map Uls1 binding sites by performing ChIP-seq on a FLAG-tagged Uls1 strain in the  
217 presence and absence of ACF. We used 100μM ACF as Uls1 activity is essential at this concentration  
218 (S2B-C Fig) and higher drug concentrations disrupted Uls1 pulldown (data not shown). Overall, there  
219 was a slight decrease in the number of unique Uls1 peaks in the presence of ACF and no significant  
220 change ( $d = 0.05$ ) in the average Uls1 peak intensity (Fig 5A). This indicates that the absolute level of



221 chromatin-bound Uls1 remains largely unchanged by ACF. However, ACF does re-distribute Uls1 to  
222 regions upstream of RNA Pol II genes (Fig 5B).

223

224 To test our hypothesis that Uls1 was directly influencing Top2 *in vivo*, we compared the behavior of  
225 Top2 peaks that either did or did not overlap with Uls1 peaks. At Top2 peaks that do not overlap with  
226 Uls1, ACF caused an increase in the amount of Top2 bound to DNA and this effect was exacerbated  
227 in *uls1Δ* cells (Fig 5C). This was similar to the trends we had observed previously (Fig 4A-B).  
228 However, strikingly, at Top2 peaks that overlap with Uls1, ACF did not cause any significant increase  
229 ( $d = 0.08$ ) in Top2 levels. Importantly, in *uls1Δ* cells, the addition of ACF resulted in an increase ( $d =$   
230 1.03) in Top2 binding at these sites (Fig 5C). These data support the model that Uls1 acts to remove  
231 Top2 trapped on chromatin by ACF.

232

233 When we looked specifically for ACF-dependent Uls1 binding sites, tRNA genes stood out. These  
234 accounted for 21% of all Uls1 peaks in the presence of ACF, but only 4% in untreated cells (S6A Fig).  
235 Most tRNA genes are duplicated in the yeast genome, with some present in as many as 16 copies per  
236 cell (47). Our standard bioinformatic analysis filters out sequence reads that map to multiple genomic  
237 locations. Therefore, due to their repetitive nature, we might be missing relevant information. By  
238 analysing unfiltered sequence reads, we see that Uls1 signal at tRNAs increases significantly ( $d =$   
239 1.16) after the addition of ACF (Fig 5D). Indeed, after looking at other repetitive loci (telomeres, rDNA  
240 and Ty retrotransposons), tRNA genes are the only regions where Uls1 signal increases significantly  
241 after ACF treatment (S6B Fig). Importantly, we also observe an antagonistic relationship between  
242 Uls1 and Top2 at tRNA genes. ACF caused a significant decrease ( $d = 1.02$ ) in Top2 signal at tRNA  
243 genes which was *ULS1*-dependent (Fig 5E). Thus, the presence of Uls1 prevents ACF-dependent  
244 Top2 accumulation at tRNA genes as it does at other genomic loci.

245

246

## 247 **DISCUSSION**

248

249 We show here that Uls1 can suppress Top2 activity by removing Top2 that becomes chromatin-bound  
250 when cells are exposed to the Top2 poison ACF. Our ChIP procedure cannot differentiate between a

251 true Top2 cleavage complex and Top2 that is non-covalently bound to DNA. However, the distribution  
252 of ACF-dependent Top2 peaks in yeast are consistent with the behaviour of *bona fide* TOP2A  
253 cleavage complexes in human cells (46) as both are independent of transcription level. This suggests  
254 that Top2 poisons are opportunistic in their mode of action and will trap Top2 molecules wherever  
255 they are found.

256

257 Although ACF leads to a general increase in Top2 binding to chromatin, there are a few regions  
258 including ribosomal protein genes (S5C Fig), tRNA genes and the rDNA locus (S6C Fig) where ACF  
259 resulted in a decrease in the amount of Top2 bound. It is not immediately clear why ACF should  
260 cause less Top2 to be DNA-bound at these sites. However, it is possible that stalled Top2 at these  
261 highly transcribed genes is more easily detected and targeted for degradation. Indeed, one of the  
262 main mechanisms of recognising Top2 adducts is via collision with the transcription machinery (48).  
263 Overall, the effects of ACF become exacerbated when *ULS1* is deleted: more Top2 peaks are found  
264 and their signal intensity is higher, consistent with more Top2 becoming chromatin-bound. We see  
265 that Uls1 tends to bind close to the 5' end of RNA Pol II gene coding regions, in agreement with what  
266 has been observed for several other Snf2 proteins (49, 50). In the presence of ACF, a significant  
267 fraction of Uls1 relocates to tRNA genes. Importantly, at Uls1 peaks, there is no ACF-dependent  
268 increase in chromatin-bound Top2, suggesting that Uls1 removes Top2 from DNA (Fig 6A-B).

269

270 We do not always see a direct anti-correlation between DNA-bound Top2 and Uls1. This may, in part,  
271 be because there is almost 30 times more Top2 than Uls1 in a yeast cell (51). Consequently, deletion  
272 of *ULS1* results in ACF-dependent changes in Top2 binding at far more sites than we see Uls1  
273 binding to. We cannot exclude that some of these effects are indirect. Moreover, Uls1-Top2  
274 interaction may be dynamic and so Uls1 may only interact transiently at any given site before  
275 dissociating away to bind another region. This is not atypical for Snf2 proteins whose ATPase activity  
276 can influence substrate binding (52, 53).

277

278 The precise mechanism by which Uls1 remodels Top2 to release it from the cleavage complex is  
279 uncertain. We see that Uls1 function is completely dependent on its ATPase activity, partially  
280 dependent on SUMO interaction and independent of its RING domain. This suggests that, at least

281 within this context, Uls1 is not acting as a STUbL to degrade proteins (35). Snf2 proteins are known to  
282 translocate along DNA in an ATP-dependent manner (54). We therefore speculate that Uls1 may use  
283 its DNA translocase activity to alter Top2-DNA interactions. This may displace Top2 from DNA or  
284 potentially alter the precise orientation of DNA within a Top2 cleavage complex and so stimulate  
285 Top2's intrinsic ATPase activity to release itself from DNA (23). It is not clear at this stage why Uls1 is  
286 recruited to tRNA genes to remodel Top2. There is very little published literature linking tRNA genes  
287 with Top2. However, topoisomerase activity appears to be largely dispensable for tRNA transcription  
288 in yeast (55). Therefore, it is possible that Uls1 is being recruited to tRNA genes to deal with stalled  
289 Top2 not because of an effect on tRNA expression but because of replication fork arrest, which  
290 occurs primarily at tRNA genes in yeast (56).

291

292 Utilising Uls1 to remodel trapped Top2 may be particularly important in lower eukaryotes as they lack  
293 the pathway used by mammals to cleave the 5'-phosphotyrosyl bond within covalent Top2-DNA  
294 complexes (57, 58). It remains to be seen whether mammalian homologs of Uls1 can carry out  
295 analogous Top2 remodelling reactions. If so, it opens up the possibility of targeting these Snf2  
296 proteins in combination with Top2 poison treatment to potentiate anticancer therapies.

297

## 298 **MATERIAL AND METHODS**

### 299 **Yeast strains**

300 A full strain list (S1 Text) and plasmid list (S2 Text) can be found in supplementary information.

301

### 302 **Protein expression and purification**

303 Full length Top2 (HFP185 - a gift from J. Berger) and mutants E66Q or I1121V (HFP271, HFP273)  
304 were expressed as previously described (23). For WT and E1109Q Uls1 expression (HFP 385,  
305 HFP404), plasmids were transformed into HFY155. 6L of YPLG media was inoculated (1:10 ratio)  
306 with a saturated overnight culture (SC-URA) and incubated at 30°C for 16 hours. Protein expression  
307 was induced by the addition of 2% galactose (final) and the culture harvested after 6-hour cultivation  
308 at 30°C. A cryogenic grinder was used to disintegrate yeast cells. The powder was diluted in Lysis  
309 buffer (50mM HEPES; pH 7.4, 500mM NaCl, 10mM imidazole, 10% glycerol, 0.5% Triton X-100 and  
310 EDTA-free protease inhibitors (Roche)) and spun at 35,000g for 1 hour at 4°C. The supernatant was

311 incubated for 30 mins with TALON resin (Clontech), washed extensively with TALON wash buffer  
312 (50mM HEPES; pH 7.4, 500mM NaCl, 10mM imidazole, 10% glycerol) and eluted with TALON elution  
313 buffer (50mM HEPES; pH 7.4, 500mM NaCl, 200mM imidazole, 10% glycerol). The eluted protein  
314 was loaded onto a Strep-Tactin XT column 1 ml (IBA), washed with Strep-Tactin wash buffer (50mM  
315 HEPES; pH 8.0, 200mM NaCl, 10% glycerol) and eluted by Strep-Tactin elution buffer (50mM HEPES;  
316 pH 8.0, 200mM NaCl, 10% glycerol, 50mM Biotin). The eluted protein was concentrated using a 10  
317 kDa MWCO Amicon spin column, frozen in liquid N<sub>2</sub> and stored in small aliquots at -80°C.

318

### 319 ***in vitro* protein interaction assay**

320 Top2 (prey) was expressed and purified as described above. To obtain the bait protein,  
321 BL21(DE3)RIL *E. coli* was transformed with the relevant plasmids (HFP219, HFP221, HFP222).. The  
322 cells were grown in TB medium at 37°C until OD<sub>600</sub> = 0.4-0.6. Expression was induced with 0.5mM  
323 IPTG and left for 16-18 hours at 16°C. The pellets were resuspended in Lysis buffer, sonicated and  
324 centrifuged at 4°C, 20,000g for 1 hour. The supernatants were added onto TALON resin (Clontech)  
325 and incubated at 4°C for 40 min. The resins were washed with TALON wash buffer and eluted with  
326 TALON elution buffer. Approximately 0.1 mg of bait protein was pre-bound with 80µl of Strep-Tactin  
327 superflow (IBA) beads and washed with Pulldown buffer (25mM HEPES; pH 7.5, 150mM KCl, 3mM  
328 MgCl<sub>2</sub>, 5% glycerol, 1mM DTT, 0.1% NP-40). 200µl of the prey protein (0.1 mg/ml) was added to the  
329 beads and incubated together with the bait or empty beads for 1 hour at 4°C. Then the beads were  
330 washed three times with Pulldown buffer and 20µl of 5x SDS-Sample buffer was added directly to the  
331 beads and boiled together with input and flowthrough fractions. The bound fraction is approximately  
332 20x more concentrated than input and flow through fractions.

333

### 334 **Topoisomerase activity assays**

335 Decatenation assays were performed using a Topoisomerase II Assay kit (TopoGEN, TG1001-1)  
336 except with yeast Top2. The reaction was incubated for 30 minutes at 30 °C and terminated by the  
337 addition of 5x Stop buffer. Samples were loaded onto a 1% agarose gel containing 0.5 µg/ml of  
338 ethidium bromide and run for 1 hour at 4 V/cm. Plasmid linearization assays was performed as  
339 described previously (24) with minor modifications. The reaction volume was 20µl. 2µl of 1µM Top2  
340 (homodimer) was added into the tube containing 5 nM pUC19 vector (166.7ng), +/- etoposide or

341 acriflavine in appropriate concentration and 2 $\mu$ l of 10x reaction buffer (500mM Tris-Cl; pH 8, 100mM  
342 MgCl<sub>2</sub>, 5mM dithiothreitol, 1.5M NaCl, 300 $\mu$ g/ml BSA). The mixed reaction was incubated at 30°C for  
343 15 min.

344 The reaction was terminated by adding 2 $\mu$ l of 10% SDS. Then 1.5 $\mu$ l of 250mM EDTA and 2 $\mu$ l of  
345 1mg/ml proteinase K was added, incubating for 2 hours at 50°C. Samples were loaded on a 1 %  
346 agarose gel containing 0.5 $\mu$ g/ml EtBr with electrophoresis carried out for 3hr at 4 V/cm.

347

#### 348 **ATPase assay**

349 An enzyme-coupled ATPase assay based on hydrolysis of ATP coupled to oxidation of NADH was  
350 used to measure the protein ATPase activity (25). 15nM Uls1 and/or 50 $\mu$ M homodimeric Top2 alone  
351 or with 100 $\mu$ M DNA (purified sheared salmon-sperm DNA, Invitrogen) were mixed together in a buffer  
352 containing 50mM Tris.HCl; pH 7.9, 100mM KCl, 8mM MgCl<sub>2</sub>, 5mM beta-mercaptoethanol, 200 $\mu$ g/ml  
353 BSA, 2mM Phospho(enol)pyruvate, 280 $\mu$ M NADH (Sigma, N7410), 0.5mM ATP and 1ul of pyruvate  
354 kinase/lactate dehydrogenase mix (Sigma, P0294). The reactions were performed in 100 $\mu$ l reaction  
355 volume in a 96 well-plate at 30 °C. The oxidation of NADH to NAD<sup>+</sup> was monitored by measuring of  
356 the fluorescence (excitation - 340 nm, Emission - 440m) every 30s for 30 min using a Spectramax  
357 Gemini XPS microplate reader. Titration of increasing concentration on NADH was used to obtain a  
358 standard curve for each measurement. The background signal was subtracted from each sample  
359 before plotting the results into the graph.

360

#### 361 **Chromatin Immunoprecipitation**

362 Cells were grown to OD<sub>600</sub> 0.6, split in two and then incubated with or without ACF for two hours.  
363 Yeast in ACF containing media were spun and re-suspended in an equivalent volume of fresh YPD  
364 before crosslinking with 1% formaldehyde for 10 minutes and quenching with 140mM glycine.

365 Yeast were disrupted using homogenization beads (0.5mm diameter, Thistle Scientific 11079105) in  
366 200 $\mu$ l lysis buffer (50mM HEPES pH 7.5, 140mM NaCl, 1mM EDTA, 1% Triton X-100, 0.1% sodium  
367 deoxycholate, protease inhibitors). They were bead beaten in a FastPrep disruptor for 5 x 30 seconds  
368 at power setting 6.5, with cooling on ice between each cycle. Lysates were diluted in a further 300 $\mu$ l  
369 lysis buffer and spun for 15 minutes at 15,000 rpm at 4°C. The pellet was resuspended in 300 $\mu$ l lysis  
370 buffer in a 1.5ml Bioruptor tube (Diagenode, C30010016) and chromatin sheared using a Bioruptor

371 Pico, 10 cycles of 30s on/off (DNA should be sheared to fragments of 250-500bp). This was  
372 centrifuged at 8,000 rpm for 5 minutes at 4°C and the supernatant used for ChIP.

373 25µl magnetic Protein A/G beads (Fisher, 11844554) and 1µg antibody (anti-FLAG: Sigma, F3165 or  
374 anti-HA: Roche, clone 3F10, ROAHAHA) per test condition are added to 500µl 5mg/ml PBS-BSA  
375 which is rotated for 1 hour at 4°C. This was washed with lysis buffer and then incubated with ChIP  
376 extract for 3 hours at 4°C. Beads are washed twice with lysis buffer for 5 minutes and then twice with  
377 wash buffer (100mM Tris pH 8, 250mM NaCl, 0.5% NP-40, 0.5% sodium deoxycholate, 1mM EDTA,  
378 protease inhibitors) before elution in 60µl TE, 1% SDS at 65°C for 15 minutes.

379 To prepare protein samples for gel-electrophoresis, samples are un-crosslinked by boiling at 95°C for  
380 15 minutes before loading onto the gel. To prepare DNA for purification, 1% SDS is added to input,  
381 0.5µl RNase A (10mg/ml) is added to both input and IP DNA, and both samples are un-crosslinked  
382 overnight at 65°C in a PCR machine. 0.5µl Proteinase K (20mg/ml) is added after uncrosslinking and  
383 samples incubated for 1 hour at 65°C. DNA was purified using Qiagen QIAquick PCR purification kit  
384 (Qiagen, 28106) as per specifications, eluting in 50µl H<sub>2</sub>O.

385

#### 386 **DNA sequencing and ChIP-seq analysis**

387 A detailed description of library preparation and bioinformatics analysis (S3 Text) can be found in  
388 supplementary information.

389

#### 390 **ACKNOWLEDGEMENTS**

391 We'd like to thank Susan M. Gasser (FMI, Basel), in whose lab this project originated, the St Andrews  
392 Bioinformatics Unit, Andy Cassidy (Tayside Centre for Genomic Analysis) and David Dickerson  
393 (Dundee) for support with the generation and analysis of ChIP-seq data. Michael Lisby (Copenhagen)  
394 carried out a genetic screen which informed this project and will be published elsewhere. Michaela  
395 Dermendjieva made tagged strains as part of a BBSRC/EASTBIO Research Experience Placement.  
396 We would also like to thank Stuart MacNeill, Malcolm White, Kazunori Tomita and Vincent Dion for  
397 critical comments and suggestions.

398

#### 399 **FIGURE LEGENDS**

400 **Figure 1. *ULS1* deletion causes sensitivity to ACF due Top2 activity.**

401 (A) 10-fold serial dilutions of WT (HFY9) or *uls1* $\Delta$  (HFY71) yeast on rich media (YPD) or drug  
402 containing plates (ACF). (B) Identification of isolated suppressor mutants and their location within the  
403 structure of the Top2 dimer (PDB ID: 4GFH). (C) Top2 point mutations were introduced into  
404 independent yeast strains to verify they are causing suppression. *top2* I1121V (HFY264) and *top2*  
405 Y510C (HFY263) alleles fully suppress the ACF sensitivity of *uls1* $\Delta$  (HFY71) such that the grow  
406 identically to WT (HFY9) on ACF. (D) *in vitro* decatenation assay. 200nM of kinetoplastid DNA was  
407 incubated for 30 mins at 30°C with 0, 3, 6, 12, 25, 50 or 100nM Top2 before being run out on a 1%  
408 agarose gel. Top2 containing the suppressor mutation I1121V (HFP273) is approximately 16-fold less  
409 active than wildtype Top2 (HFP 185) but still has significantly more activity than the ATPase dead  
410 Top2 E66Q (HFP271). A Coomassie-stained protein gel on the right illustrates the purity of expressed  
411 Top2 constructs.

412

413 **Figure 2. Physical interaction of Uls1 and Top2 is important for Uls1 function.**

414 (A) Yeast 2-hybrid assay. Yeast containing the indicated combination of Gal4 activator domain (pOAD)  
415 and Gal4 binding domain (pOBD) plasmids were grown on control (-LW) plates and assay (-LWH with  
416 5mM 3-Amino-1,2,4-triazole) plates. Full length Uls1 (HFP136) and Uls1 350-655 (HFP133) interact  
417 with Top2 (HFP 185) but not the empty vector control (HFP122). In contrast, Uls1 fragments 1-350  
418 (HFP193) and 655-1619 (HFP134) do not bind Top2. (B) *in vitro* pulldown of full length Top2 with the  
419 indicated fragments of Uls1 bound to agarose beads showing input (I), flow-through (FT) and bound  
420 (B) fractions. (C) Diagram of Uls1 domain architecture. Serial dilutions of the indicated genotypes  
421 were assayed for viability on 250 $\mu$ M ACF. Mutation of *ULS1* ATPase function (*uls1* E1109Q - HFY275)  
422 or deletion of its Top2 interaction domain (*uls1*  $\Delta$ 350-655 - HFY225) mimics *uls1* $\Delta$  (HFY71). In  
423 contrast, mutation of ULS1's RING finger (*uls1* C1385S - HFY230) has hardly any effect on ACF  
424 sensitivity whereas mutation of its five putative SIMs (HFY261) has a moderate effect on ACF  
425 sensitivity. (D) Western blot of the same constructs used in (C) indicating equivalent expression levels.  
426 Ponceau-stained membrane is used a loading control.

427

428 **Figure 3. Uls1 has DNA-stimulated ATPase activity.**

429 (A) Scheme of the coupled ATPase assay used, reactions were carried out at 30°C and  $A_{340}$   
430 measurements taken every 10s for 30 mins. (B) ATP hydrolysis rates for the indicated proteins. The

431 graph shows the average +/- the standard deviation of three independent experiments. 15nM Uls1  
432 was incubated with or without 100µM salmon sperm DNA. (C) A Coomassie-stained protein gel on the  
433 right illustrates the purity of the purified Uls1 constructs Uls1  $\Delta$ 1-349 (HFP385) and Uls1  $\Delta$ 1-349,  
434 E1109Q (HFP404).

435

436 **Figure 4. Uls1 controls Top2 chromatin binding in the presence of ACF.**

437 (A) Pairwise comparison of the average ChIP enrichment across all mapped reads (Genome) and  
438 specifically within common regions called as peaks by MACS2 (Peaks) in wildtype cells (HFY250)  
439 both in the presence or absence of 250µM ACF. Top2 peaks become significantly more intense when  
440 ACF is added, Cohen's  $d = 0.49$ . (B) The same as in A, except in *uls1* $\Delta$  cells (HFY252) showing that  
441 the effect of ACF is exacerbated, Cohen's  $d = 1.56$ . (C) Pairwise comparison of the average ChIP  
442 enrichment in the presence of 250µM ACF. Comparing common ACF-dependent peaks between  
443 wildtype (HFY250) and *uls1* $\Delta$  (HFY252) cells indicates that there is significantly more Top2 bound in  
444 *uls1* $\Delta$ , Cohen's  $d = 0.62$ . (D) Association of Top2 peaks within genes and the expression level of  
445 those genes in asynchronous culture under exponential growth. Expression data was taken from (45)  
446 and the number of peaks within each group is displayed next to the graph. (E) Normalised Top2 peak  
447 probability relative to the TSS of RNAP II transcripts in wildtype (HFY250) or *uls1* $\Delta$  (HFY252) cells in  
448 the presence or absence of ACF. The solid line displays the average with 95% confidence intervals  
449 indicated by the shaded area.

450

451 **Figure 5. Uls1 binding sites do not accumulate Top2 in the presence of ACF.**

452 (A) Pairwise comparison of the average Uls1 ChIP enrichment (HFY176) across all mapped reads  
453 (Genome) and specifically within peak regions +/- 100µM ACF. The level of Uls1 chromatin binding is  
454 independent of ACF. (B) Normalised Uls1 peak probability relative to the TSS of RNA Pol II  
455 transcribed genes in the presence or absence of ACF. The solid line displays the average with 95%  
456 confidence intervals indicated by the shaded area. (C) Comparison of the average Top2 ChIP  
457 enrichment (using filtered reads) between regions that are either bound or unbound by Uls1 +/-  
458 250µM ACF. In contrast to unbound sites, Uls1 binding sites do not accumulate Top2 in the presence  
459 of ACF. This effect is *ULS1* dependent. (D) Pairwise comparison of the average Uls1 ChIP  
460 enrichment using unfiltered reads across the genome and specifically within tRNA genes +/- 100µM



461 ACF. Uls1 becomes enriched at tRNA genes in the presence of ACF, Cohen's  $d = 1.16$ . (E) Same as  
462 (D) except looking at Top2 ChIP. ACF causes loss of Top2 from tRNA genes, which is *ULS1*  
463 dependent.

464

465 **Figure 6. Model of how Uls1 and acriflavine influence Top2 DNA binding.**

466 (A) Summary of ChIP data describing how Uls1 antagonises the ACF-dependent increase in Top2  
467 binding throughout the genome. (B) Model of how Uls1 might remodel a Top2 cleavage complex by  
468 promoting DNA-stimulated Top2 ATPase activity leading to movement of the transfer DNA (grey) and  
469 resolution of the Top2-DNA bonds within the guide DNA (black).

470

471 **Supplementary figure S1. Acriflavine is a Top2 poison.**

472 (A) Deletion of *ULS1* does not cause sensitivity to the replication inhibitor, Hydroxyurea (HU), the  
473 DNA SSB and DSB forming drug Zeocin or the Top1 poison Camptothecin. (B) *in vitro* cleavage  
474 assay. 200nM supercoiled pUC18 plasmid DNA (scDNA) was incubated for 30mins at 30°C with the  
475 indicated amounts of Top2 and either etoposide or ACF. Addition of ACF induced DNA cleavage,  
476 seen by the appearance of linear DNA, at lower concentrations than the positive control Top2 poison,  
477 etoposide. (C) 10-fold serial dilution of yeast containing either an empty vector or a vector driving  
478 expression of Top2 (HFY185) under control of the *GAL1* promoter. Overexpression of Top2 is toxic to  
479 *uls1Δ* cells and is synergistically lethal with ACF.

480

481 **Supplementary figure S2. Deletion of *ULS1* sensitises yeast to ellipticine and ACF activates the  
482 DNA damage checkpoint**

483 (A) 10-fold serial dilution of yeast showing that *ULS1* deletion causes sensitivity to the Top2 poison  
484 Ellipticine but only in a sensitising background. A *uls1Δ, rad51Δ* double mutant strain (HFY33) is  
485 significantly more sensitive than a single *rad51Δ* strain (HFY27). (B) 100μM ACF is toxic to *uls1Δ*  
486 cells. (C) 100μM ACF is sufficient to induce robust activation of the DNA damage checkpoint in *uls1Δ*  
487 yeast as visualised by Rad53 phospho-shift using an anti-Rad53 antibody (Abcam 104232).

488

489 **Supplementary figure S3. Deletion of *ULS1* does not alter Top2 protein levels**

490 (A) Yeast 2-hybrid assay showing that full-length Uls1 (HFP136) and Uls1 35-655 (HFP133) can  
491 interact with Smt3 (yeast SUMO) *in vivo* (HFP288). (B) Top panel shows Top2 protein levels as  
492 measured by Western blot using anti-Top2 (TopoGEN TG2014), or anti-HA (Roche ROAHAHA)  
493 antibodies with an anti-Tubulin (Sigma T5168) loading control. Top2 protein levels are comparable  
494 between congenic wildtype and *uls1* $\Delta$  yeast (HFY9 with HFY71, HFY294 and HFY295 with HFY297  
495 and HFY250 with HFY252). The bottom panel illustrates that HA tagging the endogenous *TOP2* locus  
496 (HFY297) suppresses ACF sensitivity in contrast to introducing an extra HA-tagged copy of *TOP2*  
497 (HFY252). (C) 10-fold serial dilutions of the indicated genotypes showing that Uls1 needs to be  
498 nuclear for its function and that the first 349 amino acids contain a nuclear localisation sequence  
499 (NLS). *uls1* $\Delta$  1-349 (HFY234) phenocopies *uls1* $\Delta$  (HFY71). However, its function is fully rescued by  
500 addition of an SV40 NLS (HFY281).

501

#### 502 **Supplementary figure S4. Top2 does not stimulate Uls1's ATPase activity**

503 (A) ATP hydrolysis rates for the indicated proteins. The graph shows the average +/- the standard  
504 deviation of three independent experiments. 50nM wildtype Top2 (HFP185) or the ATPase dead  
505 E66Q mutant (HFP271) was incubated with or without 100 $\mu$ M salmon sperm DNA. (B) 15nM Uls1  
506 (HFP350) and/or 50nM Top2 E66Q (HFP271) was incubated with or without 100 $\mu$ M salmon sperm  
507 DNA. Uls1 has weak DNA-stimulated ATPase activity which is not significantly further stimulated by  
508 Top2. Top2 E66Q was used to preferentially monitor the ATPase activity of Uls1.

509

#### 510 **Supplementary figure S5. Top2 peak number increases in the presence of ACF.**

511 (A) Table showing the number of Top2 peaks associated with RNA Pol II genes, tRNA genes and  
512 replication origins (ARS) in WT (HFY250) or *uls1* $\Delta$  (HFY252) cells in the presence (ACF) or absence  
513 (YPD) of ACF. (B) ChIP qPCR (top panel) and ChIP-seq (bottom panel) at four different regions  
514 display the same overall trends +/- ACF. Top2 ChIP qPCR was performed on WT (HFY294) and  
515 *uls1* $\Delta$  cells (HFY297) where there is only one copy of *TOP2* and this is HA tagged. (C) Gene ontology  
516 analysis of regions that show a decrease in chromatin-bound Top2 after the addition of ACF in  
517 wildtype cells. Ribosomal protein genes are significantly enriched.

518

#### 519 **Supplementary figure S6. Analysis of Top2 and Uls1 ChIP signal at repetitive loci.**

520 (A) Graph showing the number of Uls1 peaks associated with RNA Pol II genes, tRNA genes and  
521 replication origins (ARS) in WT (HF176) cells in the presence (ACF) or absence (YPD) of ACF. (B)  
522 Pairwise comparison of the average Uls1 ChIP enrichment using unfiltered reads across the genome  
523 and specifically within the rDNA locus, telomeric Y' elements, tRNA genes and Ty retrotransposons  
524 +/- 100 $\mu$ M ACF. All pairwise comparisons (+/- ACF) with a Cohen's *d* value > 0.2 are displayed. (C)  
525 Pairwise comparison of the average Top2 ChIP enrichment using unfiltered reads across the genome  
526 and specifically within the rDNA locus, telomeric Y' elements, tRNA genes and Ty retrotransposons  
527 +/- 250 $\mu$ M ACF in either WT (HFY250) or *uls1* $\Delta$  (HFY252) cells. All pairwise comparisons (+/- ACF)  
528 with a Cohen's *d* value > 0.2 are displayed.

## REFERENCES

1. Narlikar GJ, Sundaramoorthy R, Owen-Hughes T. Mechanisms and functions of ATP-dependent chromatin-remodeling enzymes. *Cell*. 2013;154(3):490-503.
2. Flaus A, Martin DM, Barton GJ, Owen-Hughes T. Identification of multiple distinct Snf2 subfamilies with conserved structural motifs. *Nucleic Acids Res*. 2006;34(10):2887-905.
3. Ryan DP, Owen-Hughes T. Snf2-family proteins: chromatin remodellers for any occasion. *Current opinion in chemical biology*. 2011;15(5):649-56.
4. Kokavec J, Podskocova J, Zavadil J, Stopka T. Chromatin remodeling and SWI/SNF2 factors in human disease. *Frontiers in bioscience : a journal and virtual library*. 2008;13:6126-34.
5. Amberger JS, Bocchini CA, Schiettecatte F, Scott AF, Hamosh A. OMIM.org: Online Mendelian Inheritance in Man (OMIM(R)), an online catalog of human genes and genetic disorders. *Nucleic Acids Res*. 2015;43(Database issue):D789-98.
6. Kadoch C, Hargreaves DC, Hodges C, Elias L, Ho L, Ranish J, et al. Proteomic and bioinformatic analysis of mammalian SWI/SNF complexes identifies extensive roles in human malignancy. *Nat Genet*. 2013;45(6):592-601.
7. Wollmann P, Cui S, Viswanathan R, Berninghausen O, Wells MN, Moldt M, et al. Structure and mechanism of the Swi2/Snf2 remodeler Mot1 in complex with its substrate TBP. *Nature*. 2011;475(7356):403-7.
8. Auble DT, Hansen KE, Mueller CG, Lane WS, Thorner J, Hahn S. Mot1, a global repressor of RNA polymerase II transcription, inhibits TBP binding to DNA by an ATP-dependent mechanism. *Genes Dev*. 1994;8(16):1920-34.
9. Wright WD, Heyer WD. Rad54 functions as a heteroduplex DNA pump modulated by its DNA substrates and Rad51 during D loop formation. *Mol Cell*. 2014;53(3):420-32.
10. Alexeev A, Mazin A, Kowalczykowski SC. Rad54 protein possesses chromatin-remodeling activity stimulated by the Rad51-ssDNA nucleoprotein filament. *Nat Struct Biol*. 2003;10(3):182-6.

11. Solinger JA, Lutz G, Sugiyama T, Kowalczykowski SC, Heyer WD. Rad54 protein stimulates heteroduplex DNA formation in the synaptic phase of DNA strand exchange via specific interactions with the presynaptic Rad51 nucleoprotein filament. *J Mol Biol.* 2001;307(5):1207-21.
12. Vos SM, Tretter EM, Schmidt BH, Berger JM. All tangled up: how cells direct, manage and exploit topoisomerase function. *Nat Rev Mol Cell Biol.* 2011;12(12):827-41.
13. Baxter J, Diffley JF. Topoisomerase II inactivation prevents the completion of DNA replication in budding yeast. *Mol Cell.* 2008;30(6):790-802.
14. Bromberg KD, Burgin AB, Osheroff N. A two-drug model for etoposide action against human topoisomerase II $\alpha$ . *J Biol Chem.* 2003;278(9):7406-12.
15. Hiasa H, Yousef DO, Mariani KJ. DNA strand cleavage is required for replication fork arrest by a frozen topoisomerase-quinolone-DNA ternary complex. *J Biol Chem.* 1996;271(42):26424-9.
16. Nitiss JL. Targeting DNA topoisomerase II in cancer chemotherapy. *Nat Rev Cancer.* 2009;9(5):338-50.
17. Yamaguchi Y, Inouye M. An endogenous protein inhibitor, YjhX (TopAI), for topoisomerase I from *Escherichia coli*. *Nucleic Acids Res.* 2015;43(21):10387-96.
18. Vos SM, Lyubimov AY, Hershey DM, Schoeffler AJ, Sengupta S, Nagaraja V, et al. Direct control of type IIA topoisomerase activity by a chromosomally encoded regulatory protein. *Genes Dev.* 2014;28(13):1485-97.
19. Sengupta S, Nagaraja V. YacG from *Escherichia coli* is a specific endogenous inhibitor of DNA gyrase. *Nucleic Acids Res.* 2008;36(13):4310-6.
20. Wei Y, Diao LX, Lu S, Wang HT, Suo F, Dong MQ, et al. SUMO-Targeted DNA Translocase Rrp2 Protects the Genome from Top2-Induced DNA Damage. *Mol Cell.* 2017;66(5):581-96 e6.
21. Delgado JL, Hsieh CM, Chan NL, Hiasa H. Topoisomerases as anticancer targets. *Biochem J.* 2018;475(2):373-98.

22. Cowell IG, Austin CA. Do transcription factories and TOP2B provide a recipe for chromosome translocations in therapy-related leukemia? *Cell Cycle*. 2012;11(17):3143-4.
23. Schmidt BH, Osheroff N, Berger JM. Structure of a topoisomerase II-DNA-nucleotide complex reveals a new control mechanism for ATPase activity. *Nat Struct Mol Biol*. 2012;19(11):1147-54.
24. Nitiss JL, Soans E, Rogojina A, Seth A, Mishina M. Topoisomerase assays. *Curr Protoc Pharmacol*. 2012;Chapter 3:Unit 3
25. Lindsley JE. Use of a real-time, coupled assay to measure the ATPase activity of DNA topoisomerase II. *Methods Mol Biol*. 2001;95:57-64.
26. Hillenmeyer ME, Fung E, Wildenhain J, Pierce SE, Hoon S, Lee W, et al. The chemical genomic portrait of yeast: uncovering a phenotype for all genes. *Science*. 2008;320(5874):362-5.
27. Woods DR, Schauder VR, Waddington PB. Acriflavine uptake and resistance in *Serratia marcescens* cells and spheroplasts. *J Bacteriol*. 1973;114(1):59-64.
28. Dana S, Prusty D, Dhayal D, Gupta MK, Dar A, Sen S, et al. Potent antimalarial activity of acriflavine in vitro and in vivo. *ACS Chem Biol*. 2014;9(10):2366-73.
29. Dekervel J, Bulle A, Windmolders P, Lambrechts D, Van Cutsem E, Verslype C, et al. Acriflavine Inhibits Acquired Drug Resistance by Blocking the Epithelial-to-Mesenchymal Transition and the Unfolded Protein Response. *Transl Oncol*. 2017;10(1):59-69.
30. Hassan S, Laryea D, Mahteme H, Felth J, Fryknas M, Fayad W, et al. Novel activity of acriflavine against colorectal cancer tumor cells. *Cancer science*. 2011;102(12):2206-13.
31. Shapiro TA, Klein VA, Englund PT. Drug-promoted cleavage of kinetoplast DNA minicircles. Evidence for type II topoisomerase activity in trypanosome mitochondria. *J Biol Chem*. 1989;264(7):4173-8.
32. Pang B, Qiao X, Janssen L, Velds A, Groothuis T, Kerkhoven R, et al. Drug-induced histone eviction from open chromatin contributes to the chemotherapeutic effects of doxorubicin. *Nature communications*. 2013;4:1908.

33. Andrews WJ, Panova T, Normand C, Gadal O, Tikhonova IG, Panov KI. Old drug, new target: ellipticines selectively inhibit RNA polymerase I transcription. *J Biol Chem.* 2013;288(7):4567-82.
34. Baldwin EL, Berger AC, Corbett AH, Osheroff N. Mms22p protects *Saccharomyces cerevisiae* from DNA damage induced by topoisomerase II. *Nucleic Acids Res.* 2005;33(3):1021-30.
35. Uzunova K, Gottsche K, Miteva M, Weisshaar SR, Glanemann C, Schnellhardt M, et al. Ubiquitin-dependent proteolytic control of SUMO conjugates. *J Biol Chem.* 2007;282(47):34167-75.
36. Bachant J, Alcasabas A, Blat Y, Kleckner N, Elledge SJ. The SUMO-1 isopeptidase Smt4 is linked to centromeric cohesion through SUMO-1 modification of DNA topoisomerase II. *Mol Cell.* 2002;9(6):1169-82.
37. Stockdale C, Flaus A, Ferreira H, Owen-Hughes T. Analysis of nucleosome repositioning by yeast ISWI and Chd1 chromatin remodeling complexes. *Journal of Biological Chemistry.* 2006;281(24):16279-88.
38. Shen X, Mizuguchi G, Hamiche A, Wu C. A chromatin remodelling complex involved in transcription and DNA processing. *Nature.* 2000;406(6795):541-4.
39. Petukhova G, Van Komen S, Vergano S, Klein H, Sung P. Yeast Rad54 promotes Rad51-dependent homologous DNA pairing via ATP hydrolysis-driven change in DNA double helix conformation. *J Biol Chem.* 1999;274(41):29453-62.
40. Matheson K, Parsons L, Gammie A. Whole-Genome Sequence and Variant Analysis of W303, a Widely-Used Strain of *Saccharomyces cerevisiae*. *G3.* 2017;7(7):2219-26.
41. Li H, Durbin R. Fast and accurate long-read alignment with Burrows-Wheeler transform. *Bioinformatics.* 2010;26(5):589-95.
42. Zhang Y, Liu T, Meyer CA, Eeckhoute J, Johnson DS, Bernstein BE, et al. Model-based analysis of ChIP-Seq (MACS). *Genome Biol.* 2008;9(9):R137.

43. Cohen J. Statistical power analysis for the behavioral sciences. 2nd. Hillsdale, NJ: Erlbaum; 1988.
44. Mondal N, Parvin JD. Transcription from the perspective of the DNA: twists and bumps in the road. *Crit Rev Eukaryot Gene Expr.* 2003;13(1):1-8.
45. Bendjilali N, MacLeon S, Kalra G, Willis SD, Hossian AK, Avery E, et al. Time-Course Analysis of Gene Expression During the *Saccharomyces cerevisiae* Hypoxic Response. *G3.* 2017;7(1):221-31.
46. Yu X, Davenport JW, Urtishak KA, Carillo ML, Gosai SJ, Kolaris CP, et al. Genome-wide TOP2A DNA cleavage is biased toward translocated and highly transcribed loci. *Genome Res.* 2017;27(7):1238-49.
47. Goodenbour JM, Pan T. Diversity of tRNA genes in eukaryotes. *Nucleic Acids Res.* 2006;34(21):6137-46.
48. Mao Y, Desai SD, Ting CY, Hwang J, Liu LF. 26 S proteasome-mediated degradation of topoisomerase II cleavable complexes. *J Biol Chem.* 2001;276(44):40652-8.
49. Yen K, Vinayachandran V, Pugh BF. SWR-C and INO80 chromatin remodelers recognize nucleosome-free regions near +1 nucleosomes. *Cell.* 2013;154(6):1246-56.
50. Yen K, Vinayachandran V, Batta K, Koerber RT, Pugh BF. Genome-wide nucleosome specificity and directionality of chromatin remodelers. *Cell.* 2012;149(7):1461-73.
51. Kulak NA, Pichler G, Paron I, Nagaraj N, Mann M. Minimal, encapsulated proteomic-sample processing applied to copy-number estimation in eukaryotic cells. *Nat Methods.* 2014;11(3):319-24.
52. Gelbart ME, Bachman N, Delrow J, Boeke JD, Tsukiyama T. Genome-wide identification of Isw2 chromatin-remodeling targets by localization of a catalytically inactive mutant. *Genes Dev.* 2005;19(8):942-54.
53. Fitzgerald DJ, DeLuca C, Berger I, Gaillard H, Sigrist R, Schimmele K, et al. Reaction cycle of the yeast Isw2 chromatin remodeling complex. *EMBO Journal.* 2004;23(19):3836-43.



54. Whitehouse I, Flaus A, Cairns BR, White MF, Workman JL, Owen-Hughes T. Nucleosome mobilization catalysed by the yeast SWI/SNF complex. *Nature*. 1999;400(6746):784-7.
55. Brill SJ, DiNardo S, Voelkel-Meiman K, Sternglanz R. Need for DNA topoisomerase activity as a swivel for DNA replication for transcription of ribosomal RNA. *Nature*. 1987;326(6111):414-6.
56. Osmundson JS, Kumar J, Yeung R, Smith DJ. Pif1-family helicases cooperatively suppress widespread replication-fork arrest at tRNA genes. *Nat Struct Mol Biol*. 2017;24(2):162-70.
57. Schellenberg MJ, Lieberman JA, Herrero-Ruiz A, Butler LR, Williams JG, Munoz-Cabello AM, et al. ZATT (ZNF451)-mediated resolution of topoisomerase 2 DNA-protein cross-links. *Science*. 2017;357(6358):1412-6.
58. Cortes Ledesma F, El Khamisy SF, Zuma MC, Osborn K, Caldecott KW. A human 5'-tyrosyl DNA phosphodiesterase that repairs topoisomerase-mediated DNA damage. *Nature*. 2009;461(7264):674-8.

# Figure 1

## A

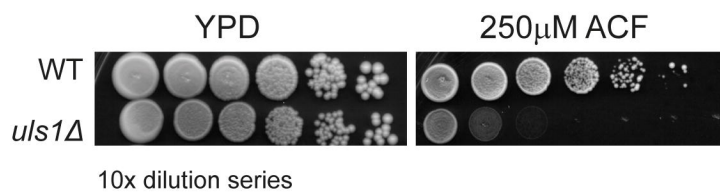

## B

|                     |                                                                                     |    |
|---------------------|-------------------------------------------------------------------------------------|----|
| Suppressor mutation |  |    |
| Top2 Y510C          |                                                                                     | 4x |
| Top2 I1121V         |                                                                                     | 2x |
| Top2 I328N          |                                                                                     | 1x |
| Top2 Q1026H         |                                                                                     | 1x |

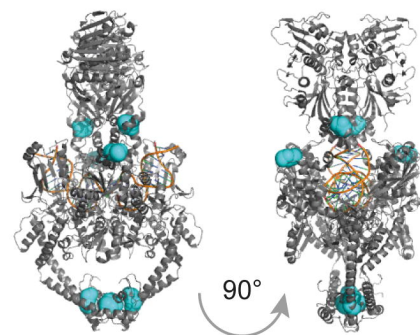

## C

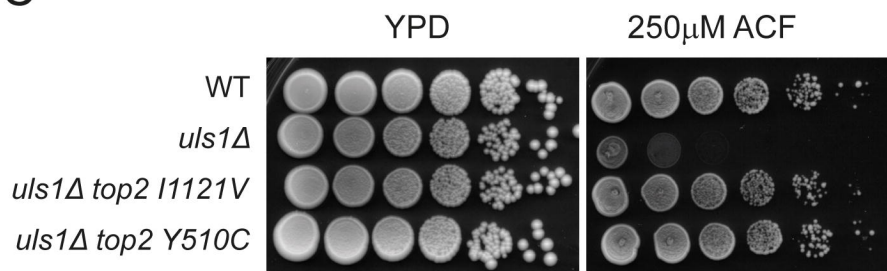

## D

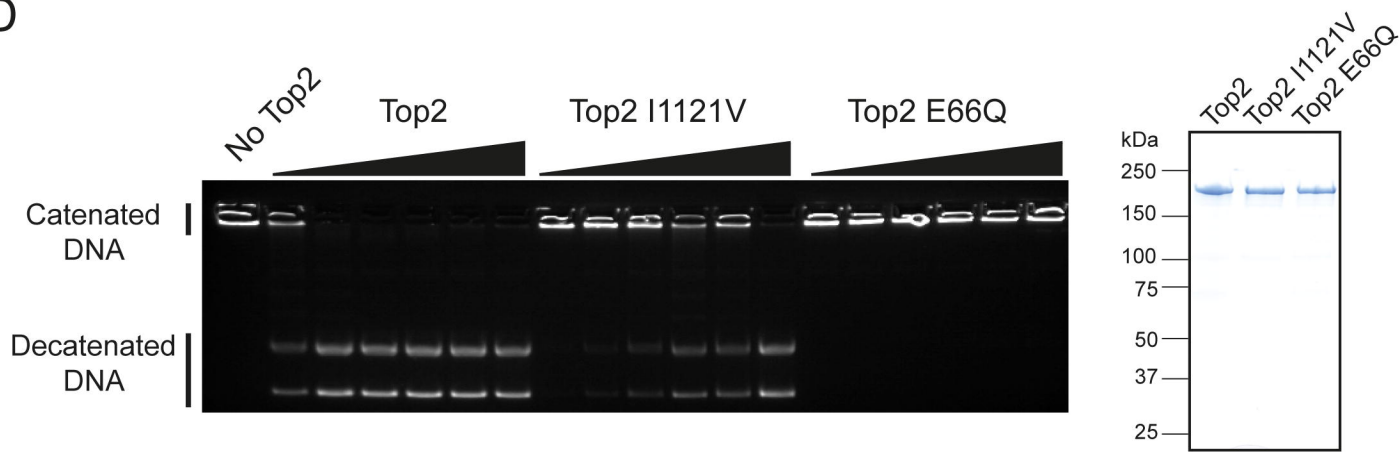

Figure 2

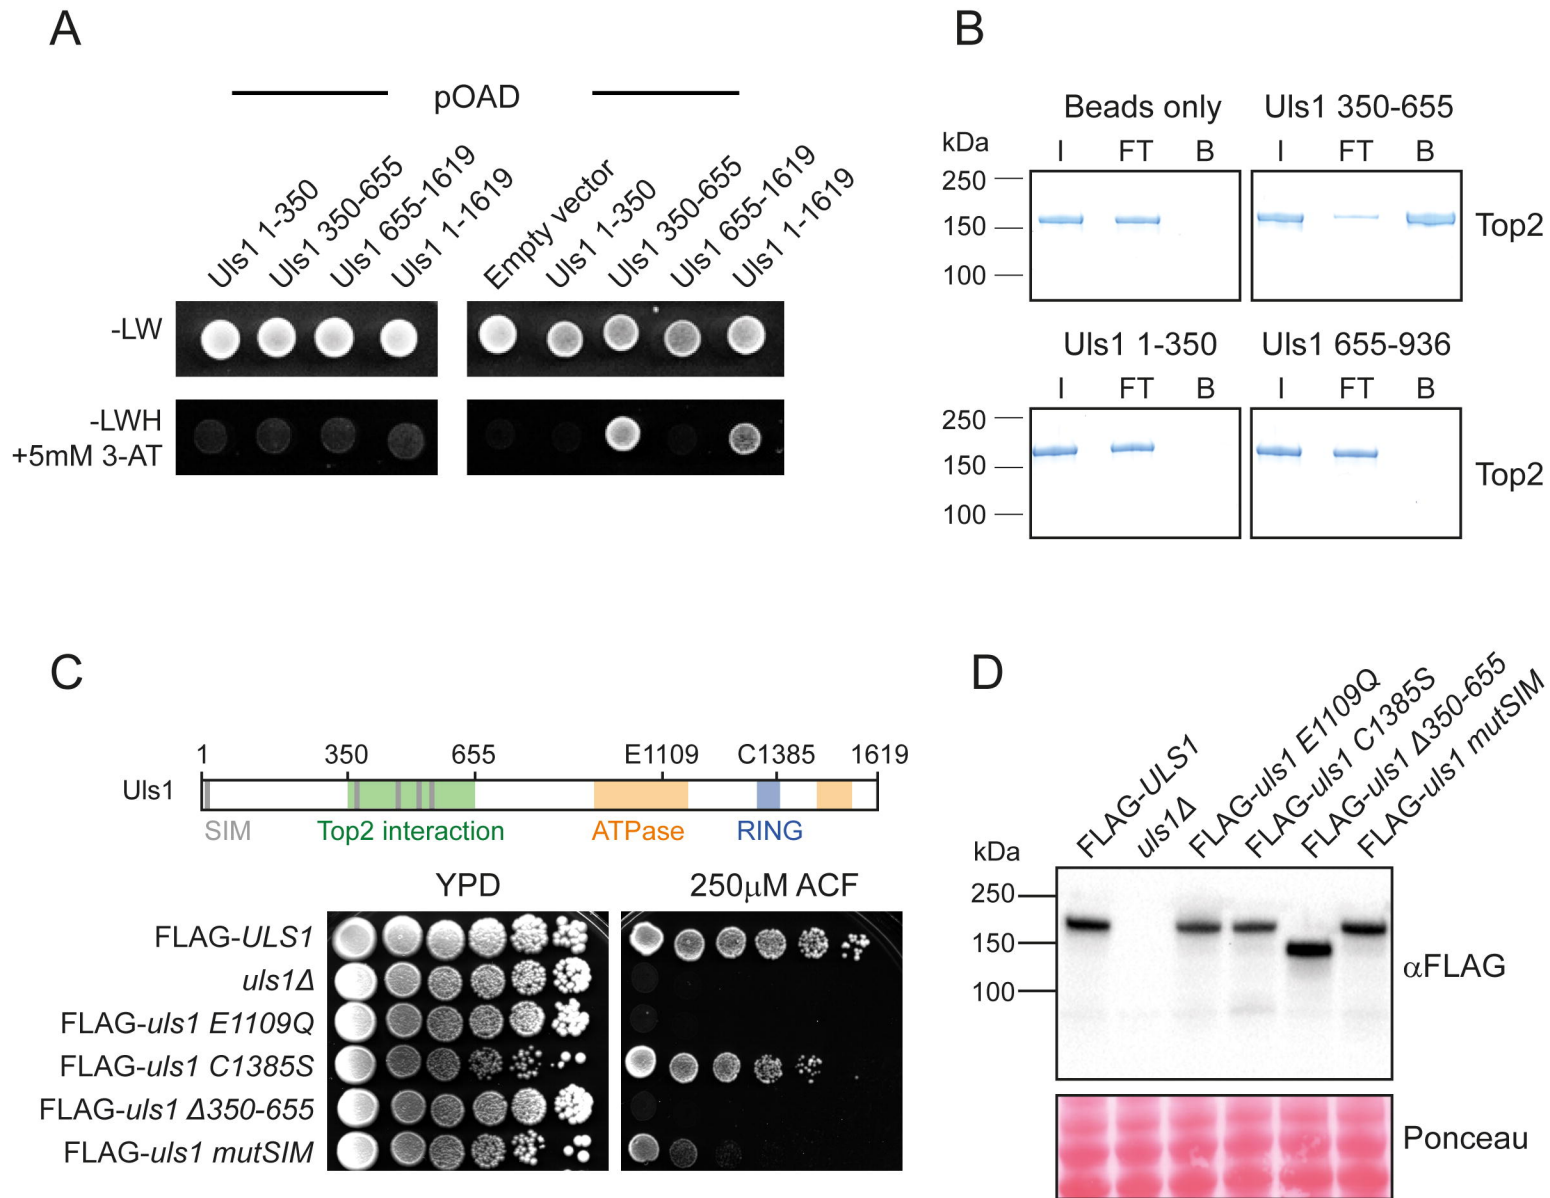

Figure 3

A

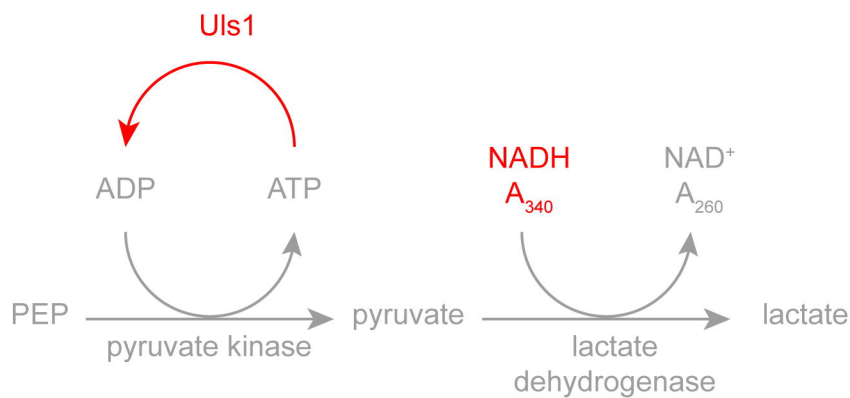

B

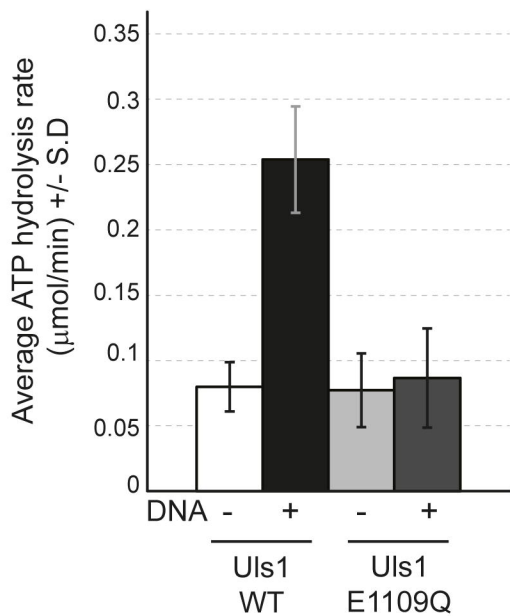

C

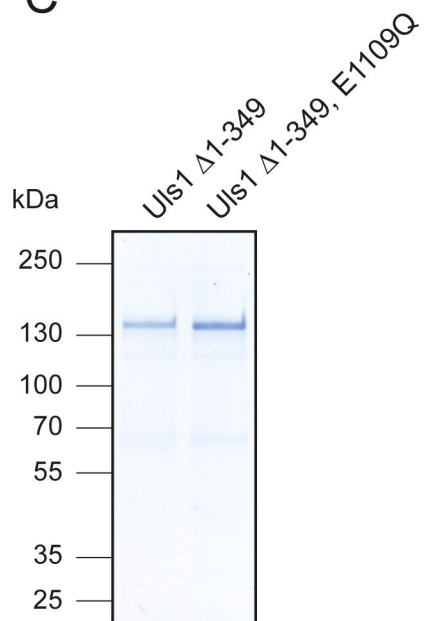

Figure 4

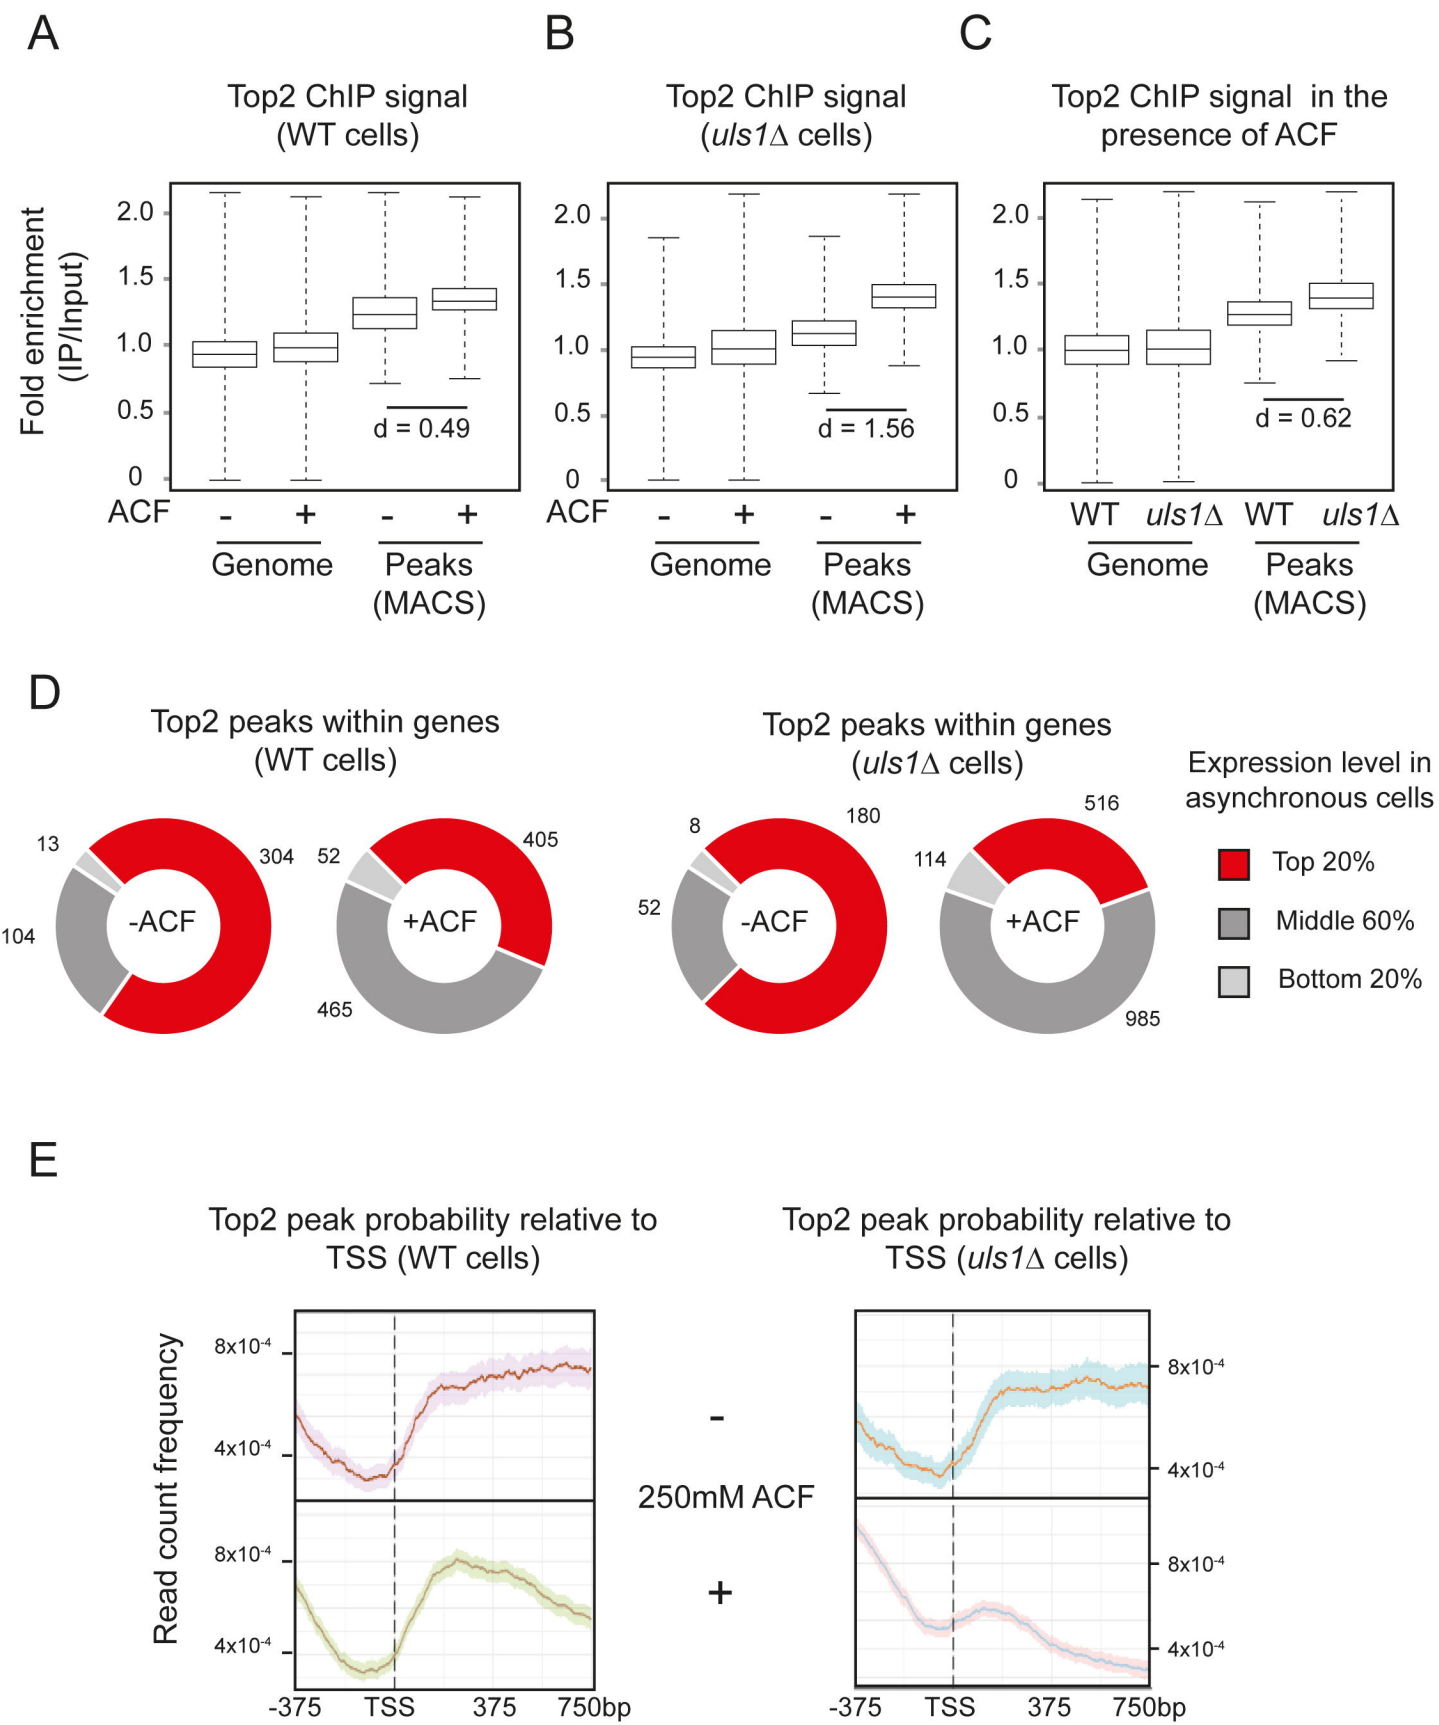

Figure 5

A

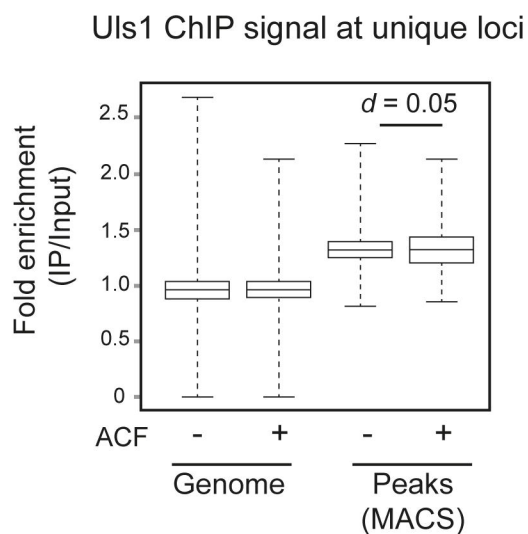

B

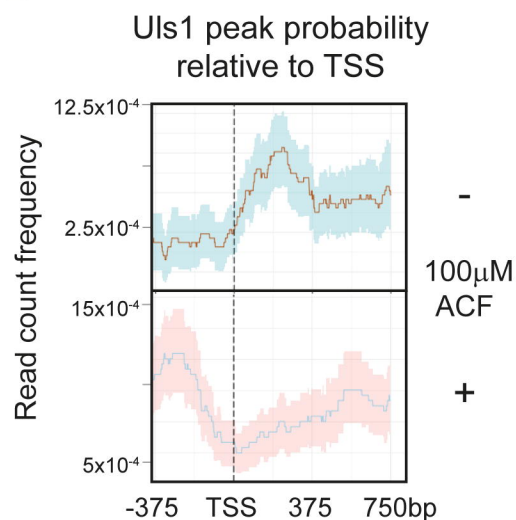

C

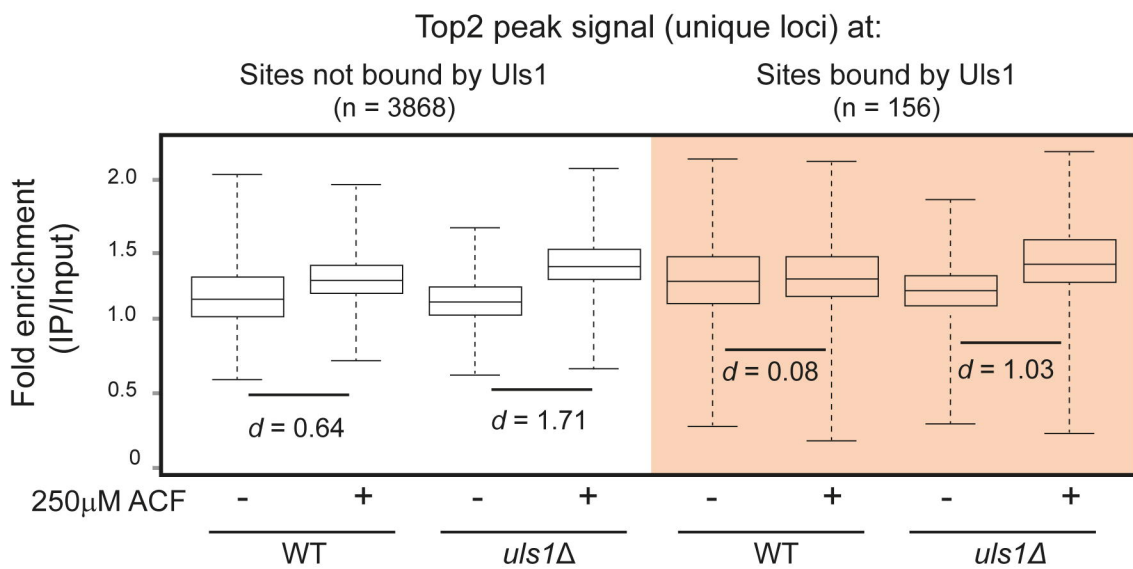

D

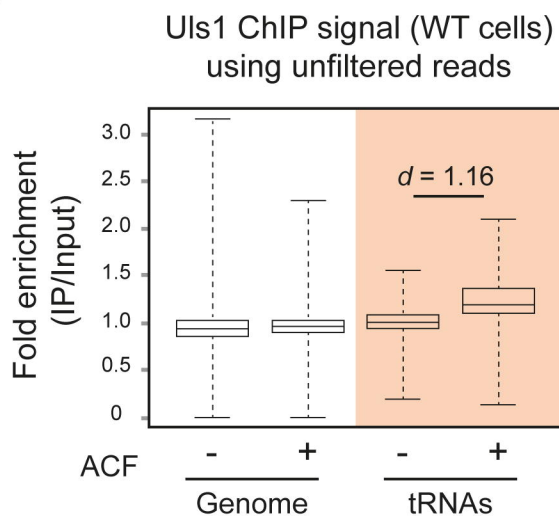

E

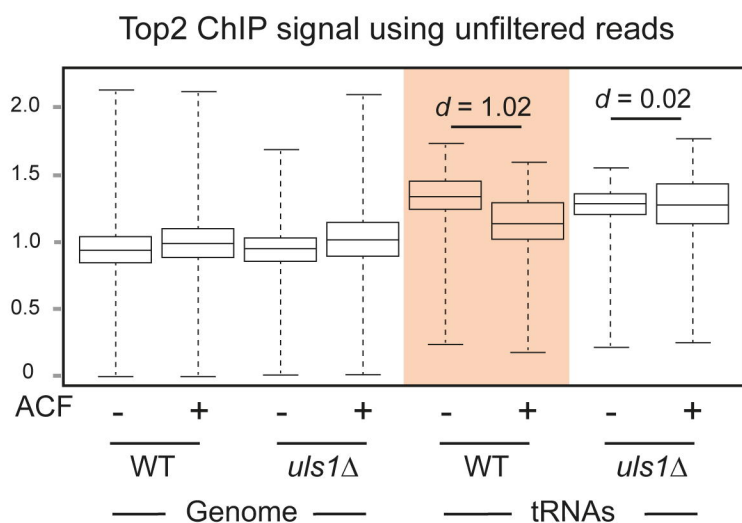

# Figure 6

## A

| Effect of ACF on Top2 peak intensity at regions that: |                           | Effect of ACF at tRNA genes |               |                      |                      |
|-------------------------------------------------------|---------------------------|-----------------------------|---------------|----------------------|----------------------|
|                                                       | Don't overlap a Uls1 peak | Overlap a Uls1 peak         |               | DNA-bound Uls1 level | DNA-bound Top2 level |
| WT                                                    | ↑                         | —                           | WT            | ↑                    | ↓                    |
| <i>uls1</i> Δ                                         | ↑                         | ↑                           | <i>uls1</i> Δ |                      | —                    |

## B

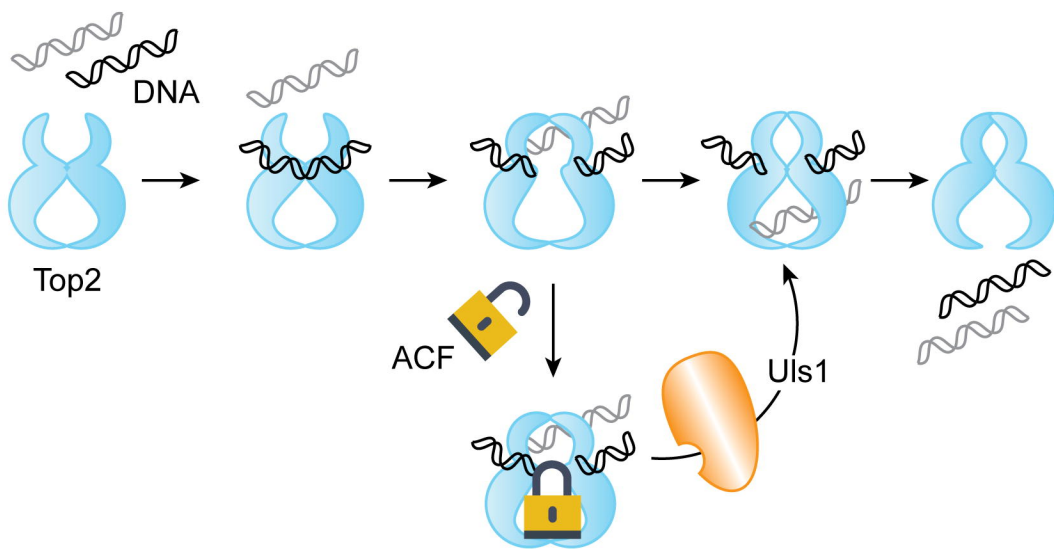

Source: https://www.biorxiv.org/content/10.1101/412783v1.full.pdf
